# Subject Index

- Activator**  
head  
role of neuropeptide HA in hydra and mammals:  
SCHALLER AND OTHERS 99
- Amphibian**  
embryo  
mesoderm induction in *Xenopus laevis*: J. C. SMITH AND OTHERS 149
- Anteroposterior pattern**  
cortical rotation of *Xenopus* egg: GERHART AND OTHERS 37
- Axolotl**  
retinoid-binding proteins and pattern generation in axolotl and chick: MADEN AND OTHERS 109
- bFGF**  
mesoderm induction in *Xenopus laevis*: J. C. SMITH AND OTHERS 149
- bicoid**  
localization of RNA in *Drosophila*: ST. JOHNSTON AND OTHERS 13
- Caenorhabditis elegans**  
intercellular signalling: AUSTIN AND OTHERS 53
- cAMP**  
prestalk zone in *Dictyostelium*: WILLIAMS AND OTHERS 91  
receptors  
G-protein-linked signal transduction system in *Dictyostelium*: JOHNSON AND OTHERS 75
- Cell**  
–cell interaction  
intercellular signalling in *C. elegans*: AUSTIN AND OTHERS 53  
determination  
models for dorsoventral patterning in insects:  
MEINHARDT 169  
differentiation  
morphogen hunting in *Dictyostelium*: KAY AND OTHERS 81  
role of neuropeptide HA in hydra and mammals:  
SCHALLER AND OTHERS 99  
fate  
intercellular signalling in *C. elegans*: AUSTIN AND OTHERS 53
- Chick**  
embryo  
retinoid-binding proteins and pattern generation in axolotl and chick: MADEN AND OTHERS 109  
limb bud  
retinoid-binding proteins and pattern generation in axolotl and chick: MADEN AND OTHERS 109
- Communication**  
intercellular  
*dpp* – a *Drosophila* TGF- $\beta$  homologue: GELBART 65
- Competence**  
FGF in early *Xenopus* development: SLACK AND OTHERS 141
- Cortical rotation**  
*Xenopus* egg: GERHART AND OTHERS 37
- CRABP (See retinoid acid-binding protein)**  
**CRBP (See retinoid-binding protein)**
- decapentaplegic**  
a *Drosophila* TGF- $\beta$  homologue: GELBART 65
- Determination**  
cell  
models for dorsoventral patterning in insects:  
MEINHARDT 169
- Developmental timer**  
mesoderm induction in *Xenopus laevis*: J. C. SMITH AND OTHERS 149
- Dictyostelium discoideum**  
formation and anatomy of prestalk zone: WILLIAMS AND OTHERS 91  
G-protein-linked signal transduction system: JOHNSON AND OTHERS 75  
morphogen hunting: KAY AND OTHERS 81
- DIF**  
prestalk zone in *Dictyostelium*: WILLIAMS AND OTHERS 91
- DIF-1**  
morphogen hunting in *Dictyostelium*: KAY AND OTHERS 81
- D<sub>2</sub>O**  
cortical rotation of *Xenopus* egg: GERHART AND OTHERS 37
- Dorsoventral pattern**  
cortical rotation of *Xenopus* egg: GERHART AND OTHERS 37
- Drosophila melanogaster**  
*dpp* – a TGF- $\beta$  homologue: GELBART 65  
embryo  
segmental polarity and identity: LEHMANN & FROHNHÖFER 21  
eye  
short-range positional signals: TOMLINSON 59  
models for dorsoventral patterning in insects:  
MEINHARDT 169  
oocyte  
localization of *bicoid* RNA: ST. JOHNSTON AND OTHERS 13  
steroid hormone receptor homologues in development:  
ORO AND OTHERS 133
- Ectopic expression**  
*int-1* – a proto-oncogene involved in cell signalling:  
McMAHON & MOON 161
- Extracellular matrix**  
prestalk zone in *Dictyostelium*: WILLIAMS AND OTHERS 91  
role of neuropeptide HA in hydra and mammals:  
SCHALLER AND OTHERS 99
- exuperantia**  
localization of *bicoid* RNA: ST. JOHNSTON AND OTHERS 13
- Eye**  
compound  
short-range positional signals in *Drosophila*:  
TOMLINSON 59  
*Drosophila*  
short-range positional signals: TOMLINSON 59
- FGF**  
cortical rotation of *Xenopus* egg: GERHART AND OTHERS 37
- Fibroblast growth factor**  
in early *Xenopus* development: SLACK AND OTHERS 141
- Gastrulation**  
cortical rotation of *Xenopus* egg: GERHART AND OTHERS 37  
mesoderm induction in *Xenopus laevis*: J. C. SMITH AND OTHERS 149

**Gene***decapentaplegic*a *Drosophila* TGF- $\beta$  homologue: GELBART 65

## maternal

segmental polarity and identity in *Drosophila*: LEHMANN & FROHNHÖFER 21

## zygotic

segmental polarity and identity in *Drosophila*: LEHMANN & FROHNHÖFER 21*glp-1*intercellular signalling in *C. elegans*: AUSTIN AND OTHERS 53**G-protein**-linked signal transduction system in *Dictyostelium*: JOHNSON AND OTHERS 75**Gradient**

## formation

localization of *bicoid* RNA: ST. JOHNSTON AND OTHERS 13

## morphogenetic

models for dorsoventral patterning in insects: MEINHARDT 169

**Head**

## activator

role of neuropeptide HA in hydra and mammals: SCHALLER AND OTHERS 99

**Homeobox**short-range positional signals in *Drosophila* eye: TOMLINSON 59**Hydra**

role of neuropeptide HA in hydra and mammals: SCHALLER AND OTHERS 99

**Imaginal disk**

## development

*dpp* – a *Drosophila* TGF- $\beta$  homologue: GELBART 65**Inducer**prestalk zone in *Dictyostelium*: WILLIAMS AND OTHERS 91**Induction**

## mesoderm

cortical rotation of *Xenopus* egg: GERHART AND OTHERS 37FGF in early *Xenopus* development: SLACK AND OTHERS 141in *Xenopus laevis*: J. C. SMITH AND OTHERS 149**Inductive interaction**

positional information review: WOLPERT 3

*int-1*

a proto-oncogene involved in cell signalling: McMAHON &amp; MOON 16

**Interaction**

## cell-cell

intercellular signalling in *C. elegans*: AUSTIN AND OTHERS 53

## inductive

positional information review: WOLPERT 3

**Intercellular communication***dpp* – a *Drosophila* TGF- $\beta$  homologue: GELBART 65*knirps*

steroid hormone receptor homologues in development: ORO AND OTHERS 133

**Limb**

## bud

retinoid-binding proteins and pattern generation in axolotl and chick: MADEN AND OTHERS 109

## morphogenesis

molecular approaches: S. M. SMITH AND OTHERS 121

## regeneration

retinoid-binding proteins and pattern generation in

axolotl and chick: MADEN AND OTHERS 109

*lin-12*intercellular signalling in *C. elegans*: AUSTIN AND OTHERS

53

**Lithium**cortical rotation of *Xenopus* egg: GERHART AND OTHERS

37

**Maternal gene**segmental polarity and identity in *Drosophila*: LEHMANN & FROHNHÖFER 21**Mesoderm**

## -inducing factors

FGF in early *Xenopus* development: SLACK AND OTHERS 141in *Xenopus laevis*: J. C. SMITH AND OTHERS 149

## induction

cortical rotation of *Xenopus* egg: GERHART AND OTHERS 37FGF in early *Xenopus* development: SLACK AND OTHERS 141in *Xenopus laevis*: J. C. SMITH AND OTHERS 149**Microfilament**localization of Vg1 RNA in *Xenopus* oocyte: YISRAELI AND OTHERS 31**Microtubule**cortical rotation of *Xenopus* egg: GERHART AND OTHERS 37localization of Vg1 RNA in *Xenopus* oocyte: YISRAELI AND OTHERS 31**Mitogen**

role of neuropeptide HA in hydra and mammals: SCHALLER AND OTHERS 99

**Model**

dorsoventral patterning in insects: MEINHARDT 169

## polar coordinate

positional information review: WOLPERT 3

**Molecular approach**

to limb morphogenesis: S. M. SMITH AND OTHERS 121

**Morphogen**FGF in early *Xenopus* development: SLACK AND OTHERS 141hunting in *Dictyostelium*: KAY AND OTHERS 81

role of neuropeptide HA in hydra and mammals: SCHALLER AND OTHERS 99

**Morphogenetic gradient**

models for dorsoventral patterning in insects: MEINHARDT 169

**Nerve**

## sensory

retinoid-binding proteins and pattern generation in axolotl and chick: MADEN AND OTHERS 109

**Nervous system**

retinoid-binding proteins and pattern generation in axolotl and chick: MADEN AND OTHERS 109

**Neural expression***int-1* – a proto-oncogene involved in cell signalling: McMAHON & MOON 161**Neural tube**

## bifurcation

*int-1* – a proto-oncogene involved in cell signalling: McMAHON & MOON 161

- retinoid-binding proteins and pattern generation in axolotl and chick: MADEN AND OTHERS 109
- Oogenesis**  
*Drosophila*  
 localization of *bicoid* RNA: ST. JOHNSTON AND OTHERS 13
- Organizer**  
 cortical rotation of *Xenopus* egg: GERHART AND OTHERS 37
- Pattern**  
 anteroposterior  
 cortical rotation of *Xenopus* egg: GERHART AND OTHERS 37  
 dorsoventral  
 cortical rotation of *Xenopus* egg: GERHART AND OTHERS 37  
 formation  
*dpp* – a *Drosophila* TGF- $\beta$  homologue: GELBART 65  
 models for dorsoventral patterning in insects: MEINHARDT 169  
 positional information review: WOLPERT 3  
 retinoid-binding proteins and pattern generation in axolotl and chick: MADEN AND OTHERS 109  
 segmental  
 polarity and identity in *Drosophila*: LEHMANN & FROHNHÖFER 21
- Phosphorylation**  
 G-protein-linked signal transduction system in *Dictyostelium*: JOHNSON AND OTHERS 75
- Polar coordinate model**  
 positional information review: WOLPERT 3
- Polarity**  
 cortical rotation of *Xenopus* egg: GERHART AND OTHERS 37  
 localization of Vg1 RNA in *Xenopus* oocyte: YISRAELI AND OTHERS 31  
 positional information review: WOLPERT 3
- Positional information**  
*dpp* – a *Drosophila* TGF- $\beta$  homologue: GELBART 65  
 review: WOLPERT 3
- Positional signal**  
 short-range  
 in *Drosophila* eye: TOMLINSON 59
- Positional signalling**  
*int-1* – a proto-oncogene involved in cell signalling: McMAHON & MOON 161
- Prestalk zone**  
 formation and anatomy in *Dictyostelium*: WILLIAMS AND OTHERS 91
- Protein**  
 G-linked signal transduction system in *Dictyostelium*: JOHNSON AND OTHERS 75  
 retinoic acid-binding  
 pattern generation in axolotl and chick: MADEN AND OTHERS 109
- Proto-oncogene**  
*int-1*  
 involved in cell signalling: McMAHON & MOON 161
- Receptor**  
 fibroblast growth factor  
 in early *Xenopus* development: SLACK AND OTHERS 141  
 steroid/thyroid  
 homologues in development: ORO AND OTHERS 133
- Regeneration**  
 limb  
 retinoid-binding proteins and pattern generation in axolotl and chick: MADEN AND OTHERS 109
- Retinoic acid**  
 molecular approaches to limb morphogenesis: S. M. SMITH AND OTHERS 121  
 pattern generation in axolotl and chick: MADEN AND OTHERS 109  
 positional information review: WOLPERT 3
- Retinoic acid-binding protein**  
 molecular approaches to limb morphogenesis: S. M. SMITH AND OTHERS 121  
 pattern generation in axolotl and chick: MADEN AND OTHERS 109
- Retinol**  
 -binding protein  
 pattern generation in axolotl and chick: MADEN AND OTHERS 109
- RNA**  
 localization  
*bicoid* in *Drosophila*: ST. JOHNSTON AND OTHERS 13  
 of Vg1 in *Xenopus* oocyte: YISRAELI AND OTHERS 31
- Rotation**  
 cortical  
*Xenopus* egg: GERHART AND OTHERS 37
- Segmental pattern**  
*Drosophila*  
 segmental polarity and identity: LEHMANN & FROHNHÖFER 21
- Segregation**  
 cell types  
 models for dorsoventral patterning in insects: MEINHARDT 169
- Sensory nerve**  
 retinoid-binding proteins and pattern generation in axolotl and chick: MADEN AND OTHERS 109
- Short-range**  
 positional signals in *Drosophila* eye: TOMLINSON 59
- staußen**  
 localization of *bicoid* RNA: ST. JOHNSTON AND OTHERS 13
- Steroid hormone**  
 receptor homologues in development: ORO AND OTHERS 133
- swallow**  
 localization of *bicoid* RNA: ST. JOHNSTON AND OTHERS 13
- TGF- $\beta$**   
 cortical rotation of *Xenopus* egg: GERHART AND OTHERS 37  
*dpp* – a *Drosophila* TGF- $\beta$  homologue: GELBART 65  
 localization of Vg1 RNA in *Xenopus* oocyte: YISRAELI AND OTHERS 31
- Threshold**  
 mesoderm induction in *Xenopus laevis*: J. C. SMITH AND OTHERS 149
- Thyroid**  
 receptor homologues in development: ORO AND OTHERS 133
- Timer**  
 developmental  
 mesoderm induction in *Xenopus laevis*: J. C. SMITH AND OTHERS 149
- Transcriptional control**  
 steroid hormone receptor homologues in development: ORO AND OTHERS 133

**Transforming growth factor beta**

FGF in early *Xenopus* development: SLACK AND OTHERS  
141

**Tyrosine kinase transmembrane receptor**

short-range positional signals in *Drosophila* eye:  
TOMLINSON 59

**Ventral floor plate**

retinoid-binding proteins and pattern generation in axolotl  
and chick: MADEN AND OTHERS 109

**Vg1**

localization of RNA in *Xenopus* oocyte: YISRAELI AND  
OTHERS 31

**wingless**

*int-1* – a proto-oncogene involved in cell signalling:  
McMAHON & MOON 161

***Xenopus laevis***

egg

cortical rotation: GERHART AND OTHERS 37

embryo

mesoderm induction: J. C. SMITH AND OTHERS 149

FGF in early development: SLACK AND OTHERS 141

oocyte

localization of Vg1 RNA: YISRAELI AND OTHERS 31

**XTC-MIF**

mesoderm induction in *Xenopus laevis*: J. C. SMITH AND  
OTHERS 149

**Zygotic gene**

*Drosophila*

segmental polarity and identity: LEHMANN &  
FROHNHÖFER 21
